# Supplementary material
Source: Copernicus journal article supplement (doi:10.5194/egusphere-2026-1614)
Supplement: Supplementary file 1 [file egusphere-2026-1614-supplement.pdf]

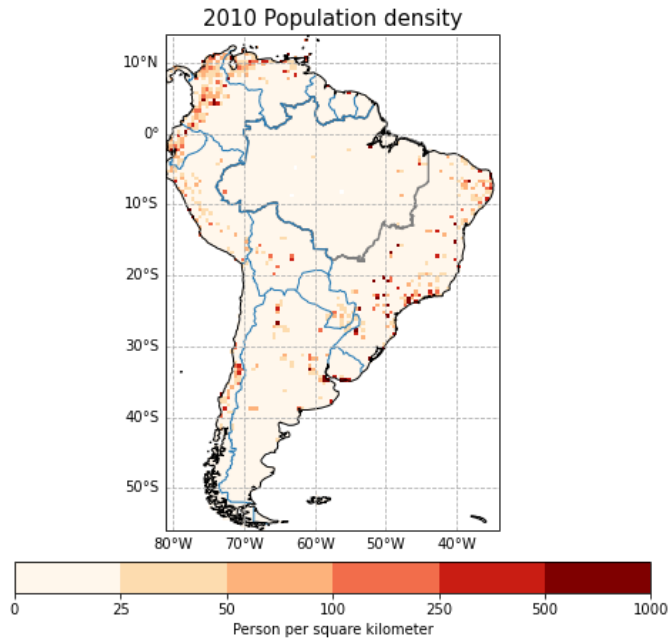

**Figure S1.** 2010 aggregated population density in South America estimated by Gridded Population of the World, version 4, revision 11 (GPWv4.11) (Center for International Earth Science Information Network, 2018).

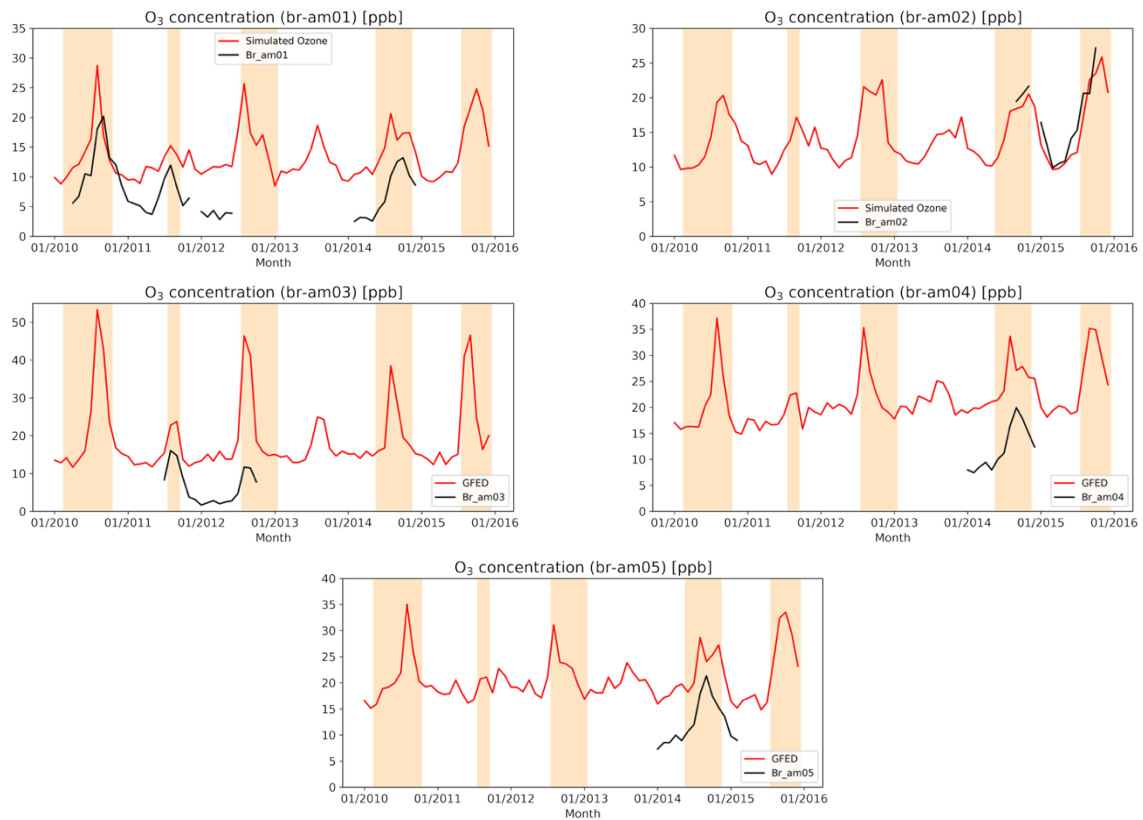

**Figure S2.** Time series comparison of surface ozone concentrations between five ground stations of Tropospheric Ozone Assessment Report (TOAR) and the nearest grid cell in GCHP simulations.

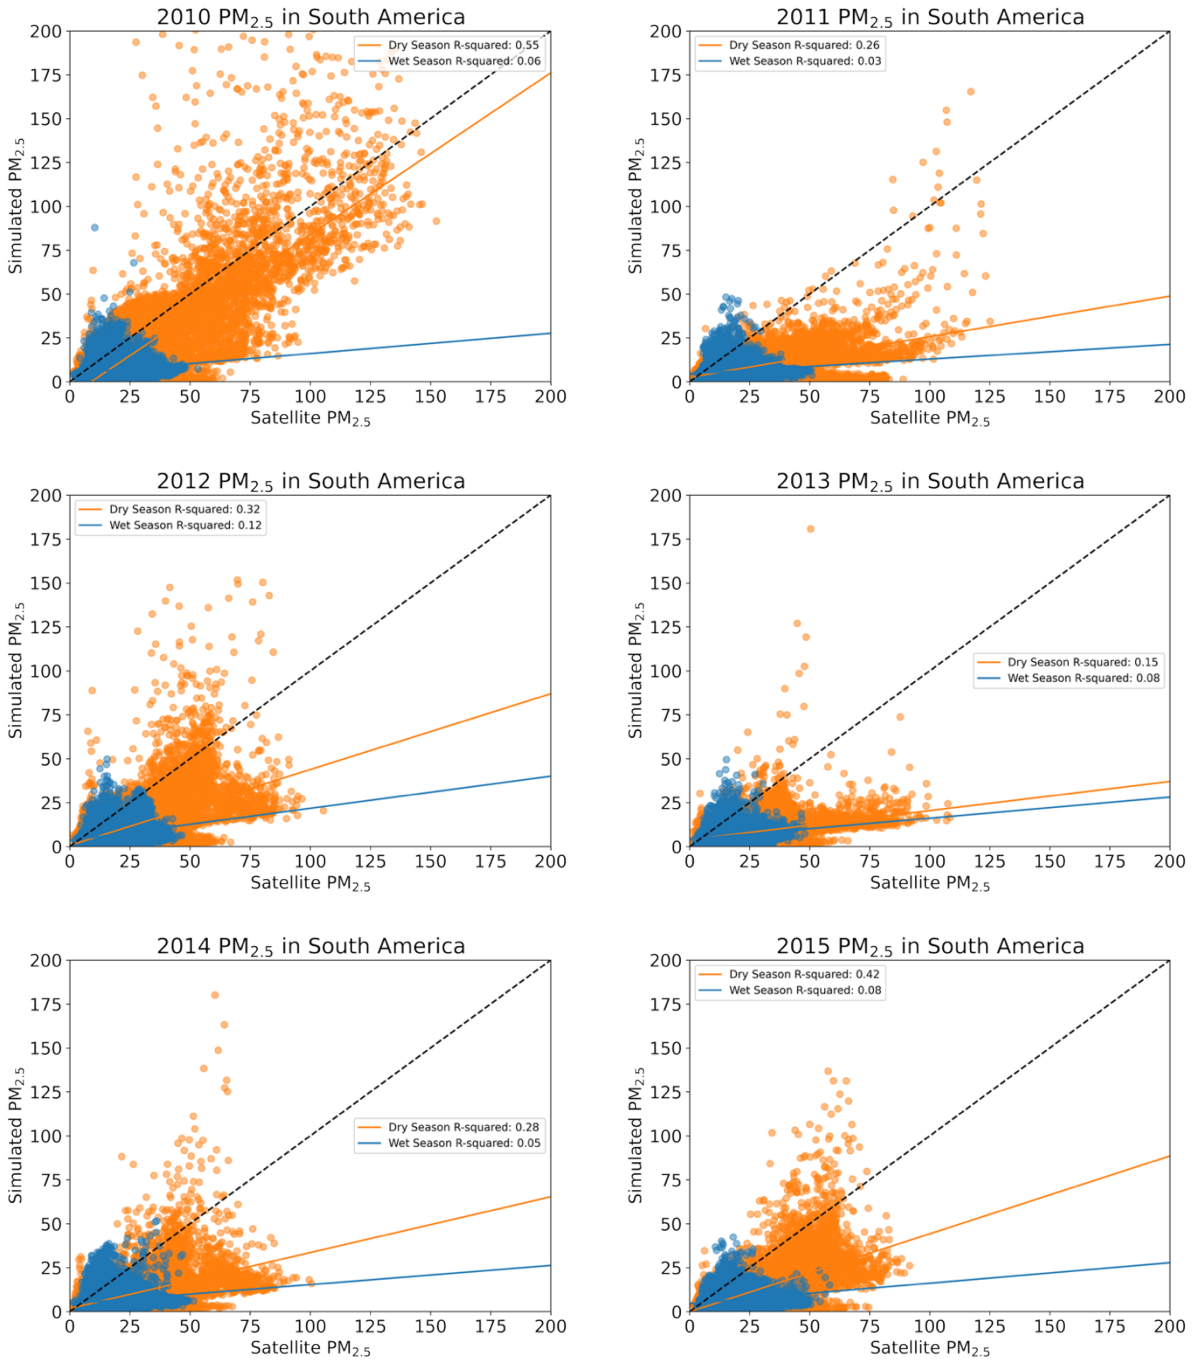

**Figure S3.** Comparison of GCHP versus satellite-derived monthly  $PM_{2.5}$  for 2010-2015 over South America (land-only). Orange circles represent the Amazonian wet season (January to May); blue circles, the dry season (July to November).

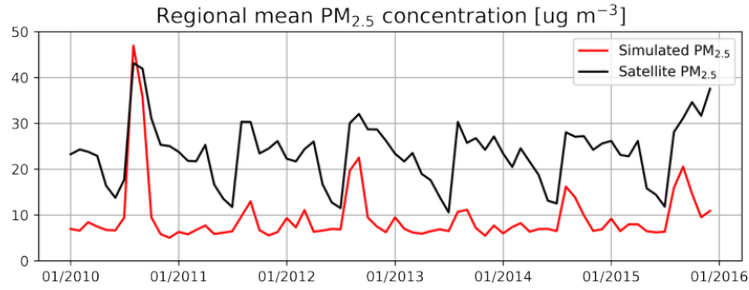

**Figure S4.** Time series comparison between GCHP simulated surface PM<sub>2.5</sub> (red) and satellite derived surface PM<sub>2.5</sub> (black) obtained from global monthly mean dataset between Jan 2010 to Dec 2015.

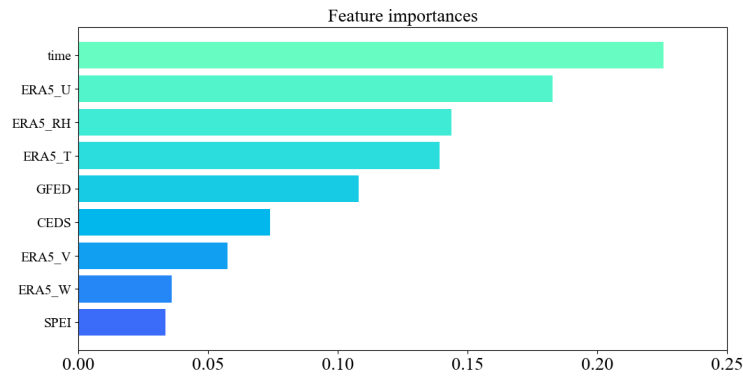

**Figure S5.** Feature importances of different variables to the biases between GCHP-simulated surface PM<sub>2.5</sub> concentration and satellite-derived surface PM<sub>2.5</sub> concentration.

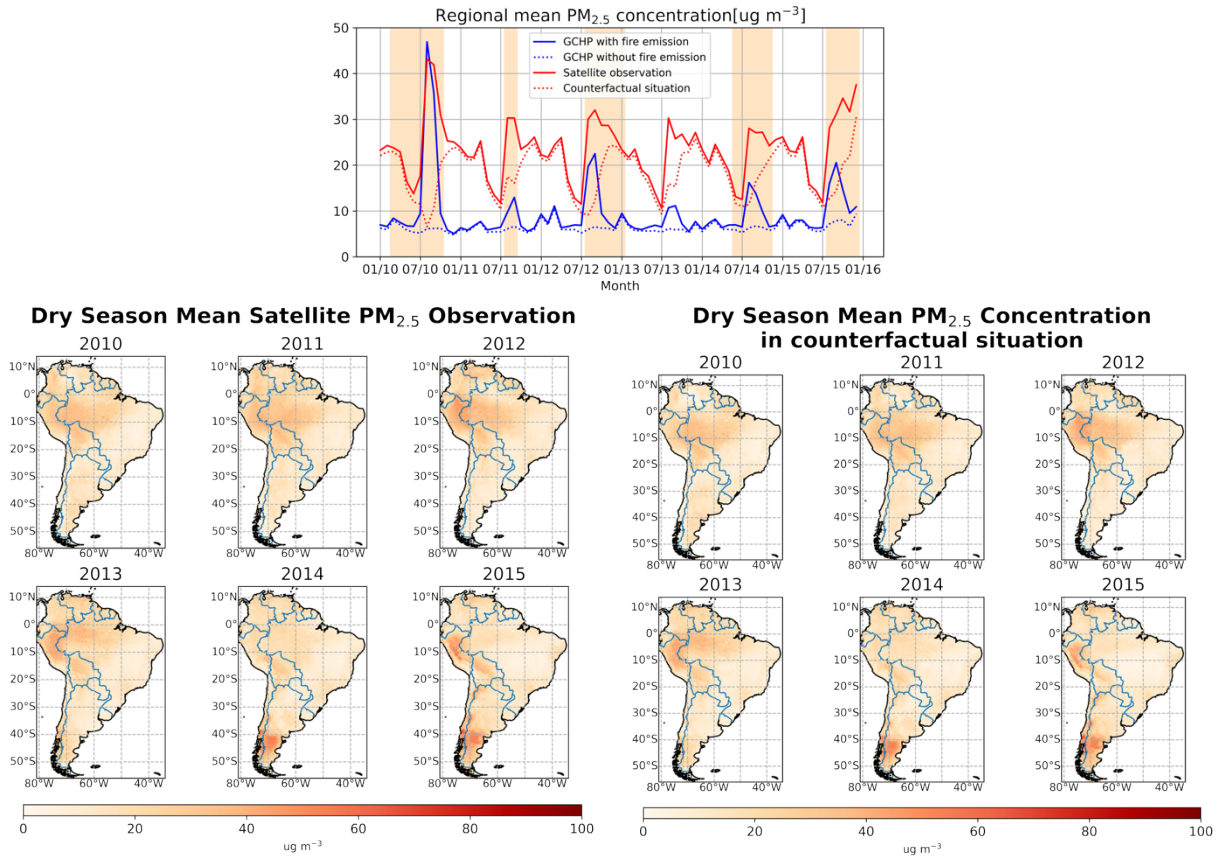

**Figure S6.** (a) Time series plot of GCHP simulated PM<sub>2.5</sub> with fire emission (blue solid), without fire emission (blue dotted), satellite PM<sub>2.5</sub> observation (red) and PM<sub>2.5</sub> concentration in counterfactual situation (red dotted). Dry season mean (b) satellite PM<sub>2.5</sub> observation and (c) derived concentration in counterfactual situation.

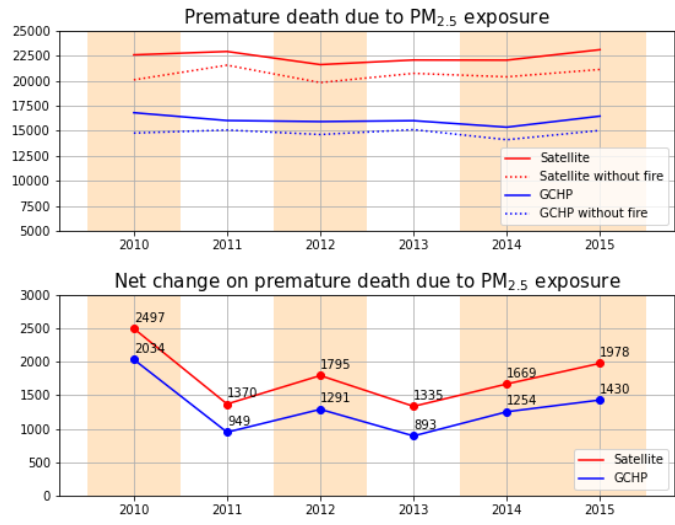

**Figure S7.** Timeseries of (a) annual premature mortalities due to exposure to PM<sub>2.5</sub> and (b) net change on annual premature mortalities due to exposure to fire-emitted PM<sub>2.5</sub> using direct GCHP output (blue) and satellite-derived with GCHP correction (red).

**Table S1** Emission factors from Global Fire Emission Dataset version 4 (GFEDv4) (van der Werf et al., 2017).

| Species                                        | Tropical Forest | Temperate Forest | Boreal Forest | Savanna   | Agricultural Waste | Peat    |
|------------------------------------------------|-----------------|------------------|---------------|-----------|--------------------|---------|
| CO <sub>2</sub>                                | 1643            | 1647             | 1489          | 1686      | 1585               | 1549    |
| CO                                             | 93              | 88               | 127           | 63        | 102                | 210     |
| CH <sub>4</sub>                                | 5.07            | 3.36             | 5.96          | 1.94      | 5.82               | 13.825  |
| NMHC                                           | 1.7             | 8.4              | 8.4           | 3.4       | 9.9                | x       |
| H <sub>2</sub>                                 | 3.36            | 2.03             | 2.03          | 1.7       | 2.59               | x       |
| NO <sub>x</sub> (as NO)                        | 2.55            | 1.92             | 0.9           | 3.9       | 3.11               | 1       |
| N <sub>2</sub> O                               | 0.2             | 0.16             | 0.41          | 0.2       | 0.1                | x       |
| PM <sub>2.5</sub>                              | 9.1             | 12.9             | 15.3          | 7.17      | 6.26               | x       |
| TPM                                            | 13              | 17.6             | 17.6          | 8.5       | 12.4               | x       |
| TPC (OC+BC)                                    | 5.24            | 10.1             | 10.1          | 3         | 3.05               | 6.06    |
| OC                                             | 4.71            | 9.6              | 9.6           | 2.62      | 2.3                | 6.02    |
| BC                                             | 0.52            | 0.5              | 0.5           | 0.37      | 0.75               | 0.04    |
| SO <sub>2</sub>                                | 0.4             | 1.1              | 1.1           | 0.48      | 0.4                | x       |
| C <sub>2</sub> H <sub>6</sub> (ethane)         | 0.71            | 0.63             | 1.79          | 0.66      | 0.91               | x       |
| CH <sub>3</sub> OH (methanol)                  | 2.43            | 1.74             | 2.82          | 1.18      | 3.29               | 6.25    |
| C <sub>2</sub> H <sub>5</sub> OH (ethanol)     | 0.037           | 0.1              | 0.055         | 0.024     | 0.035              | x       |
| C <sub>3</sub> H <sub>8</sub> (propane)        | 0.126           | 0.22             | 0.44          | 0.1       | 0.28               | x       |
| C <sub>2</sub> H <sub>2</sub> (acetylene)      | 0.44            | 0.26             | 0.18          | 0.24      | 0.27               | 0.08    |
| C <sub>2</sub> H <sub>4</sub> (ethylene)       | 1.06            | 1.17             | 1.42          | 0.82      | 1.46               | 1.97    |
| C <sub>3</sub> H <sub>6</sub> (propylene)      | 0.64            | 0.61             | 1.13          | 0.79      | 0.68               | 2.92    |
| C <sub>5</sub> H <sub>8</sub> (isoprene)       | 0.13            | 0.099            | 0.15          | 0.039     | 0.38               | 1.38    |
| C <sub>10</sub> H <sub>16</sub> (terpenes)     | 0.15            | 2.003            | 2.003         | 0.081     | 0.005              | x       |
| C <sub>7</sub> H <sub>8</sub> (toluene)        | 0.26            | 0.19             | 0.48          | 0.08      | 0.19               | 1.55    |
| C <sub>6</sub> H <sub>6</sub> (benzene)        | 0.39            | 0.27             | 1.11          | 0.2       | 0.15               | 3.19    |
| C <sub>8</sub> H <sub>10</sub> (xylene)        | 0.11            | 0.13             | 0.18          | 0.014     | 0.114              | x       |
| Toluene lump                                   | 0.6970139       | 0.5404448        | 1.6258951     | 0.2703381 | 0.41518508         | 4.35983 |
| Higher Alkenes                                 | 0.2674285       | 0.3694285        | 0.3848571     | 0.1332    | 0.33342857         | x       |
| Higher Alkanes                                 | 0.0722821       | 0.2245700        | 0.3494449     | 0.0549472 | 0.33955880         | x       |
| CH <sub>2</sub> O (formaldehyde)               | 1.73            | 2.09             | 1.86          | 0.73      | 2.08               | 1.695   |
| C <sub>2</sub> H <sub>4</sub> O (acetaldehyde) | 1.55            | 0.77             | 0.77          | 0.57      | 1.24               | 3.27    |
| C <sub>3</sub> H <sub>6</sub> O (acetone)      | 0.63            | 0.54             | 0.75          | 0.16      | 0.45               | 1.25    |
| NH <sub>3</sub> (ammonia)                      | 1.33            | 0.84             | 2.72          | 0.52      | 2.17               | x       |
| C <sub>2</sub> H <sub>6</sub> S (dms)          | 0.00135         | 0.008            | 0.00465       | 0.0013    | 0.0013             | x       |
| NH <sub>3</sub> (ammonia)                      | 1.33            | 0.84             | 2.72          | 0.52      | 2.17               | x       |
| C <sub>2</sub> H <sub>6</sub> S (dms)          | 0.00135         | 0.008            | 0.00465       | 0.0013    | 0.0013             | x       |
| HCN (hydrogen cyanide)                         | 0.42            | 0.72             | 1.52          | 0.41      | 0.29               | 6.6     |
| HCOOH (formic acid)                            | 0.79            | 0.28             | 0.57          | 0.21      | 1                  | 0.63    |
| CH <sub>3</sub> COOH (acetic acid)             | 3.05            | 2.13             | 4.41          | 3.55      | 5.59               | 8.13    |
| MEK (methyl Ethyl Ketone)                      | 0.5             | 0.13             | 0.22          | 0.181     | 0.9                | x       |
| CH <sub>3</sub> COCHO (methylglyoxal)          | 0.73            | 0.73             | 0.73          | 0.73      | 0.73               | x       |
| HOCH <sub>2</sub> CHO<br>(hydroxyacetaldehyde) | 0.74            | 0.86             | 0.86          | 0.25      | 0.71               | x       |
| Combustion Completeness<br>(CC)                | 0.4917505       | 0.4894161        | 0.4649894     | 0.4882731 | 0.48035201         | 0.52282 |

**Table S2** Baseline mortality rates obtained from Global Burden of Disease (GBD).

| Sex    | Age         | Cause                        | Value      |
|--------|-------------|------------------------------|------------|
| Female | 25-29 years | Lower respiratory infections | 2.78245435 |
| Female | 25-29 years | Ischemic heart disease       | 1.53130145 |

|        |             |                              |            |
|--------|-------------|------------------------------|------------|
| Female | 25-29 years | Stroke                       | 2.85034078 |
| Female | 30-34 years | Lower respiratory infections | 3.59900647 |
| Female | 30-34 years | Ischemic heart disease       | 3.43416113 |
| Female | 30-34 years | Stroke                       | 5.23204765 |
| Female | 35-39 years | Lower respiratory infections | 4.76043924 |
| Female | 35-39 years | Ischemic heart disease       | 7.17408212 |
| Female | 35-39 years | Stroke                       | 10.3348412 |
| Female | 40-44 years | Lower respiratory infections | 6.74626082 |
| Female | 40-44 years | Ischemic heart disease       | 15.743864  |
| Female | 40-44 years | Stroke                       | 20.3725127 |
| Female | 45-49 years | Lower respiratory infections | 9.81062598 |
| Female | 45-49 years | Ischemic heart disease       | 32.7502345 |
| Female | 45-49 years | Stroke                       | 32.5160714 |
| Female | 50-54 years | Lower respiratory infections | 15.2685162 |
| Female | 50-54 years | Ischemic heart disease       | 55.0732145 |
| Female | 50-54 years | Stroke                       | 49.0338998 |
| Female | 55-59 years | Lower respiratory infections | 23.4317703 |
| Female | 55-59 years | Ischemic heart disease       | 88.0125886 |
| Female | 55-59 years | Stroke                       | 70.4061655 |
| Female | 60-64 years | Lower respiratory infections | 36.9893078 |
| Female | 60-64 years | Ischemic heart disease       | 146.78515  |
| Female | 60-64 years | Stroke                       | 105.338656 |
| Female | 65-69 years | Lower respiratory infections | 65.249512  |
| Female | 65-69 years | Ischemic heart disease       | 236.796355 |
| Female | 65-69 years | Stroke                       | 175.77584  |
| Female | 70-74 years | Lower respiratory infections | 123.893763 |
| Female | 70-74 years | Ischemic heart disease       | 379.296204 |
| Female | 70-74 years | Stroke                       | 307.659775 |
| Female | 75-79 years | Lower respiratory infections | 245.196109 |
| Female | 75-79 years | Ischemic heart disease       | 579.852709 |
| Female | 75-79 years | Stroke                       | 534.032198 |
| Female | 80+ years   | Lower respiratory infections | 879.503716 |
| Female | 80+ years   | Ischemic heart disease       | 1362.43486 |
| Female | 80+ years   | Stroke                       | 1274.77364 |
| Male   | 25-29 years | Lower respiratory infections | 4.63860607 |
| Male   | 25-29 years | Ischemic heart disease       | 4.06449607 |
| Male   | 25-29 years | Stroke                       | 3.01496519 |
| Male   | 30-34 years | Lower respiratory infections | 6.7828033  |
| Male   | 30-34 years | Ischemic heart disease       | 9.19195351 |
| Male   | 30-34 years | Stroke                       | 5.39738423 |
| Male   | 35-39 years | Lower respiratory infections | 10.2394054 |
| Male   | 35-39 years | Ischemic heart disease       | 18.3790601 |
| Male   | 35-39 years | Stroke                       | 10.3518353 |
| Male   | 40-44 years | Lower respiratory infections | 14.8316832 |
| Male   | 40-44 years | Ischemic heart disease       | 37.4501464 |
| Male   | 40-44 years | Stroke                       | 20.5104289 |
| Male   | 45-49 years | Lower respiratory infections | 21.9448594 |
| Male   | 45-49 years | Ischemic heart disease       | 74.4307288 |
| Male   | 45-49 years | Stroke                       | 37.4920038 |

|      |             |                              |            |
|------|-------------|------------------------------|------------|
| Male | 50-54 years | Lower respiratory infections | 32.3688776 |
| Male | 50-54 years | Ischemic heart disease       | 134.743167 |
| Male | 50-54 years | Stroke                       | 67.6695385 |
| Male | 55-59 years | Lower respiratory infections | 45.7913992 |
| Male | 55-59 years | Ischemic heart disease       | 214.575517 |
| Male | 55-59 years | Stroke                       | 110.848993 |
| Male | 60-64 years | Lower respiratory infections | 64.8854565 |
| Male | 60-64 years | Ischemic heart disease       | 309.399209 |
| Male | 60-64 years | Stroke                       | 177.456956 |
| Male | 65-69 years | Lower respiratory infections | 105.613723 |
| Male | 65-69 years | Ischemic heart disease       | 453.047517 |
| Male | 65-69 years | Stroke                       | 292.519057 |
| Male | 70-74 years | Lower respiratory infections | 188.912317 |
| Male | 70-74 years | Ischemic heart disease       | 646.013708 |
| Male | 70-74 years | Stroke                       | 481.826824 |
| Male | 75-79 years | Lower respiratory infections | 340.234856 |
| Male | 75-79 years | Ischemic heart disease       | 906.263832 |
| Male | 75-79 years | Stroke                       | 780.140875 |
| Male | 80+ years   | Lower respiratory infections | 944.566408 |
| Male | 80+ years   | Ischemic heart disease       | 1643.54237 |
| Male | 80+ years   | Stroke                       | 1460.57749 |

**Table S3** Station location of Tropospheric Ozone Assessment Report (TOAR).

| <b>Station ID</b> | <b>Station longitude</b> | <b>Station latitude</b> |
|-------------------|--------------------------|-------------------------|
| Br-am01           | -60.21                   | -2.59                   |
| Br-am02           | -54.96                   | -2.85                   |
| Br-am03           | -63.87                   | -8.69                   |
| Br-am04           | -60.60                   | -3.21                   |
| Br-am05           | -60.13                   | -3.14                   |
